# Supplementary material
Source: Springer Nature journal article supplement (https://www.springermedizin.de/resource/supplementary/12879_2012_2323_MOESM3_ESM.pdf/9445510)
Supplement: MOESM3 [file 9445510]

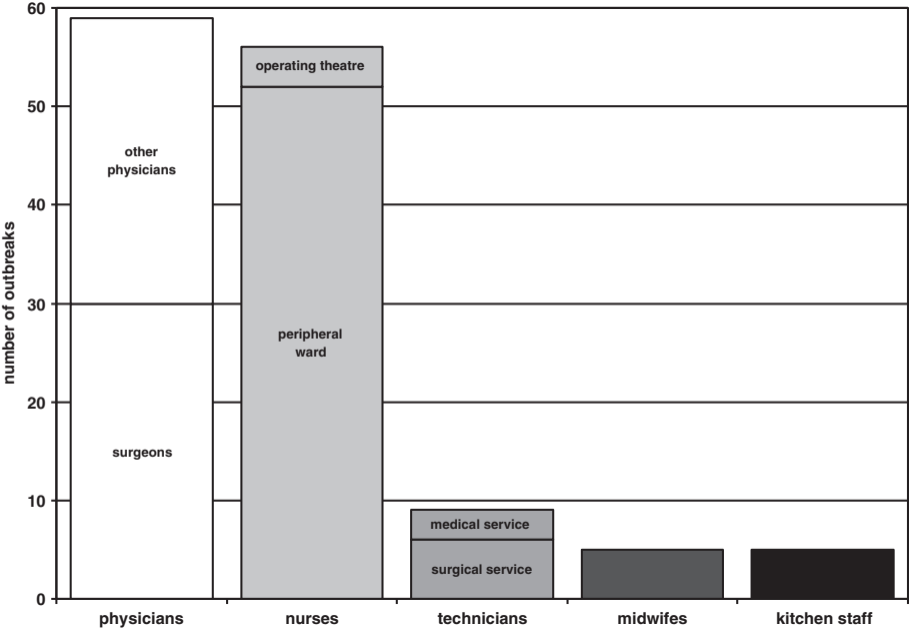

number of outbreaks

60

50

40

30

20

10

0

other  
physicians

surgeons

operating theatre

peripheral  
ward

medical service

surgical service

physicians

nurses

technicians

midwives

kitchen staff
